# Supplementary material for: p53-R273H upregulates neuropilin-2 to promote cell mobility and tumor metastasis
Source: PubMed Central journal article supplement (PMC5596564; doi:10.1038/cddis.2017.376), 2017-08-10

**A**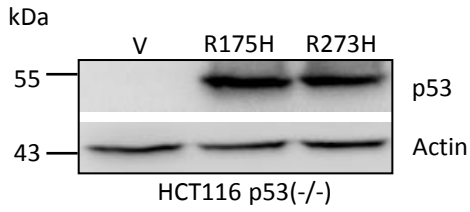**B**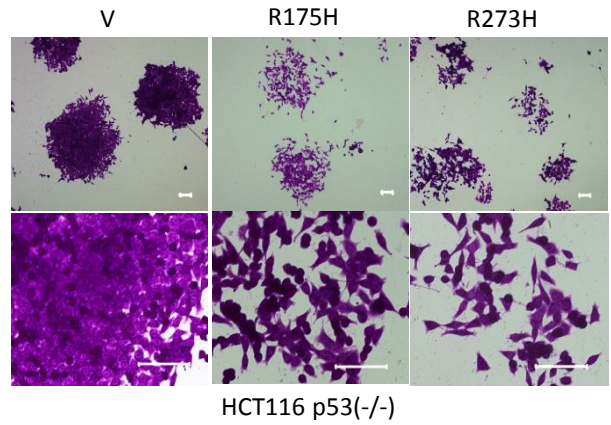**C**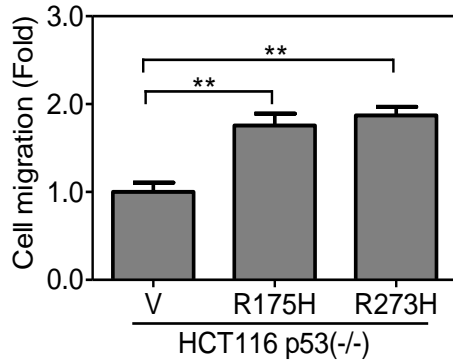**D**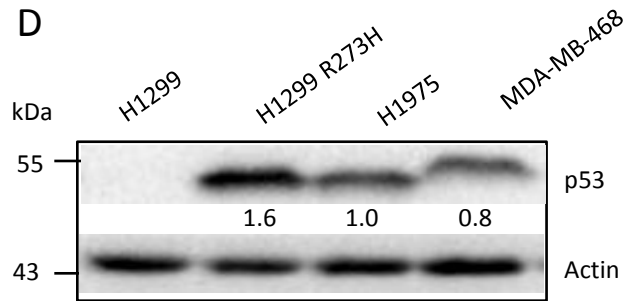

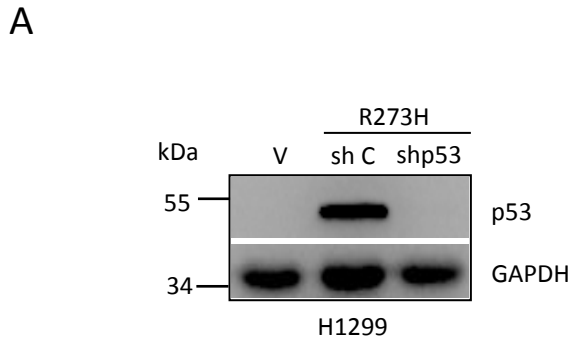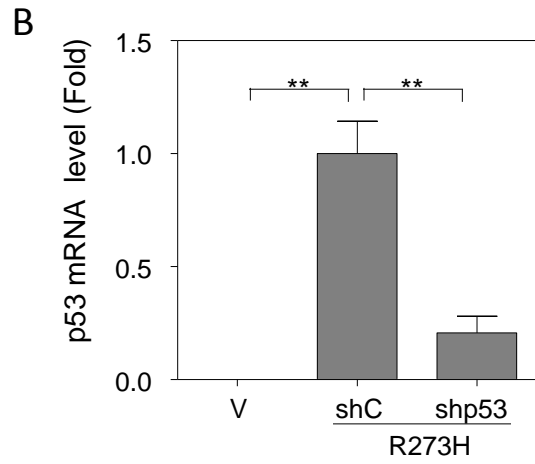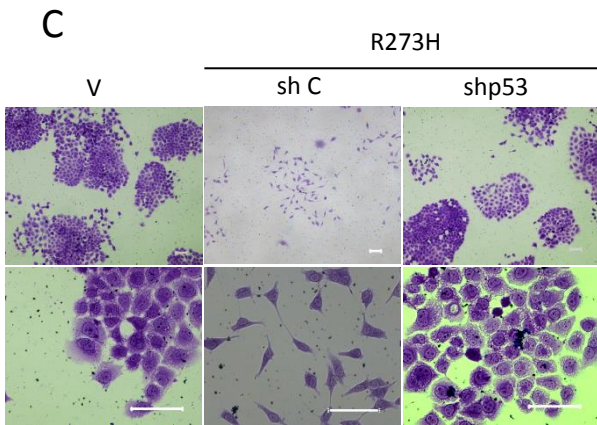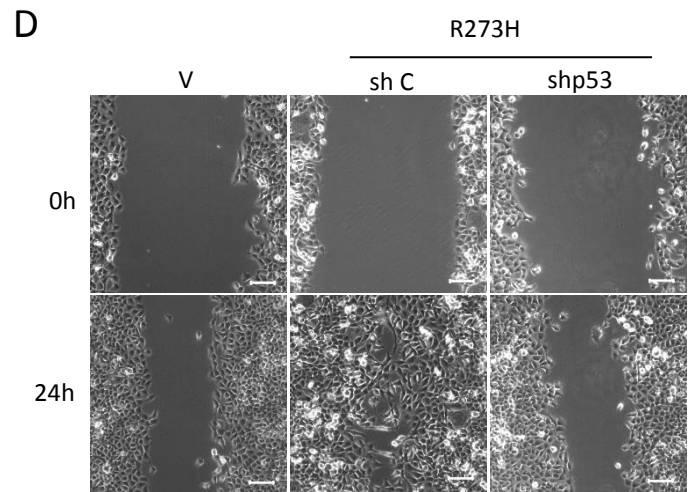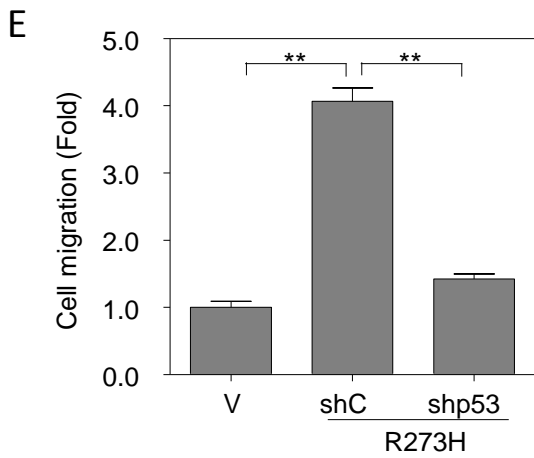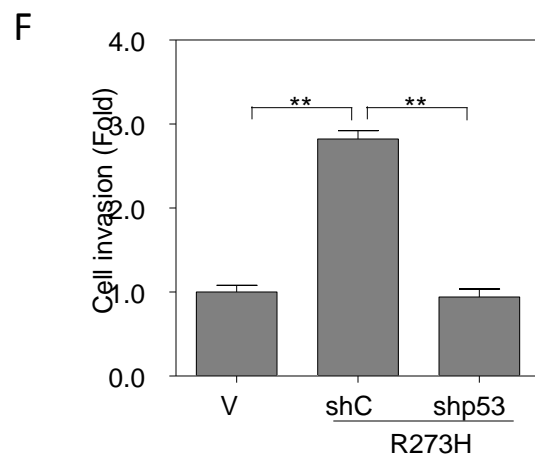

**A**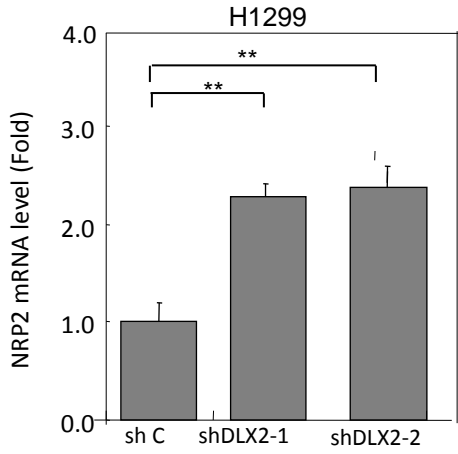**B**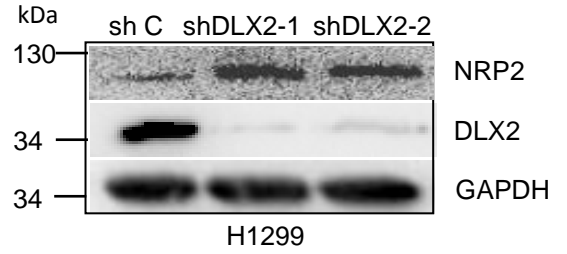**C**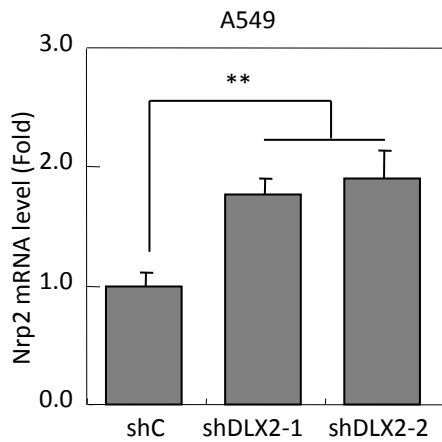**D**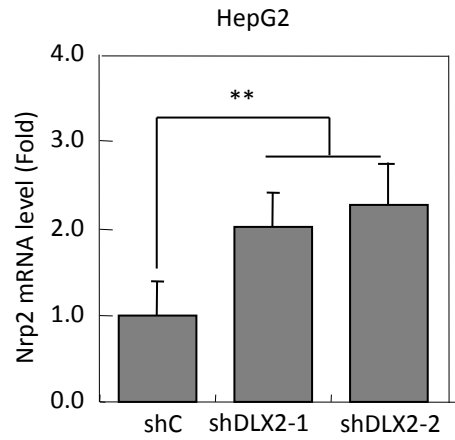

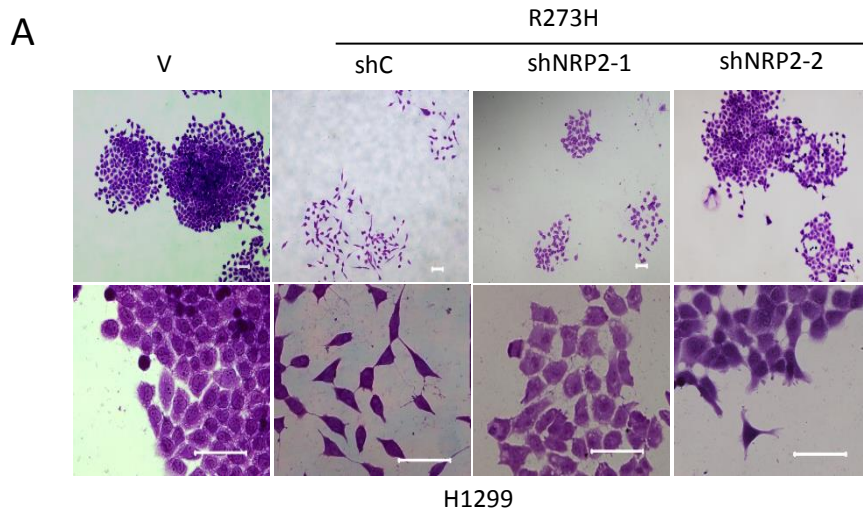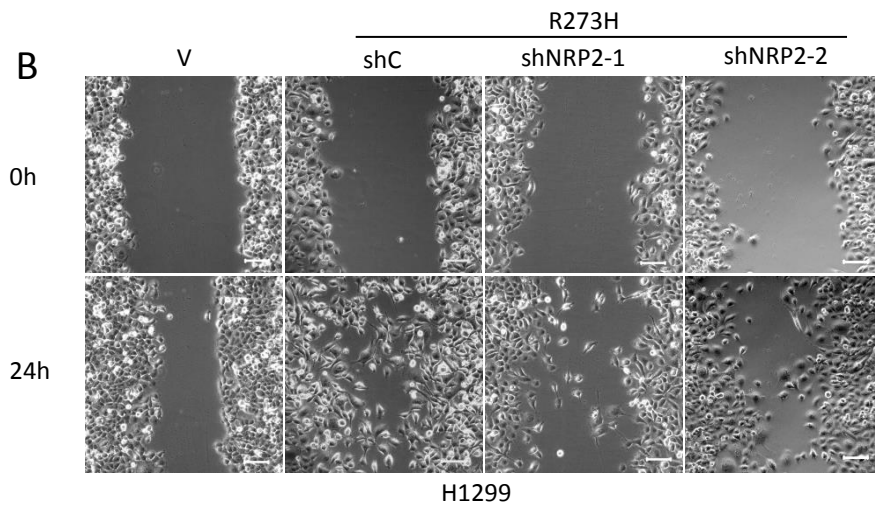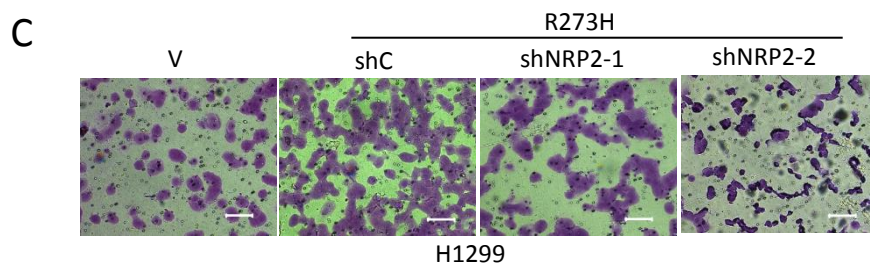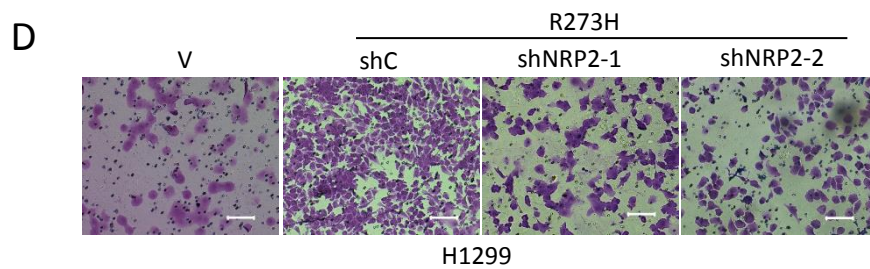

A

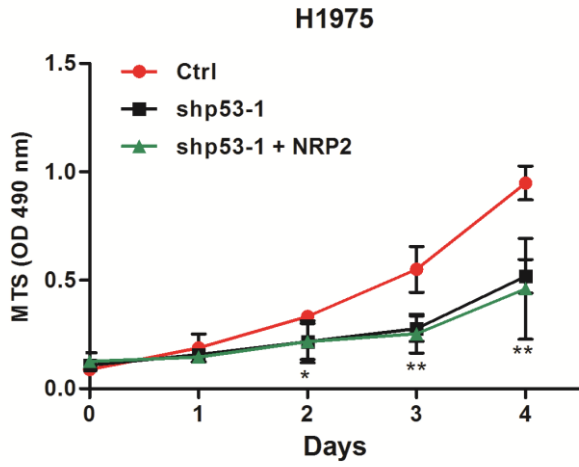

B

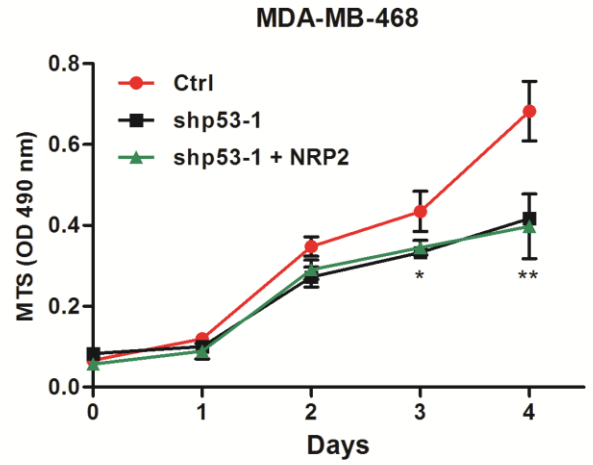

Supplement: cddis2017376x1.pdf [file cddis2017376x1.pdf]
